# Supplementary material for: Synthesis, Phase-Transition Behaviour, and Oil Adsorption Performance of Porous Poly(oligo(ethylene glycol) Alkyl Ether Acrylate) Gels
Source: MDPI journal article supplement (doi:10.3390/polym12061405), 2020-06-23
Supplement: s1 [file s1]

## Synthesis, phase-transition behaviour, and oil adsorption performance of porous poly(*oligo*(ethylene glycol) alkyl ether acrylate) gels

Syed Ragib Safi, Taku Nakata, Shyotaro Hara, Takehiko Gotoh\*, Takashi Iizawa and Satoshi Nakai

Department of Chemical Engineering, Hiroshima University, 1-4-1 Kagamiyama, Higashi Hiroshima, Hiroshima, Japan 739-8527

\* Correspondence: [tgoto@hiroshima-u.ac.jp](mailto:tgoto@hiroshima-u.ac.jp); Tel.: +81-82-424-7720

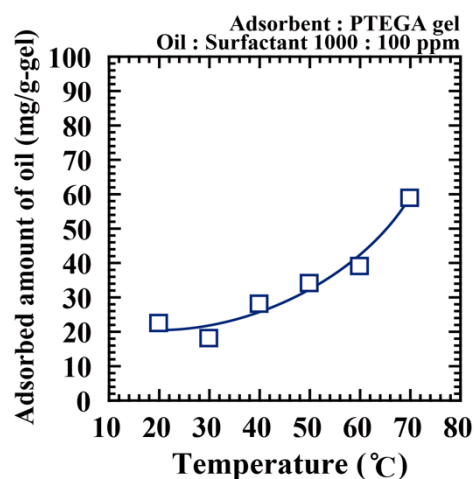

**Figure S1.** Effect of temperature on oil adsorption by PTEGA gel.
